# Supplementary material
Source: ML conference proceedings conference paper supplement (https://proceedings.neurips.cc/paper_files/paper/2022/hash/b44ae90136013a8d0e2d24f6015b6097-Abstract.html)
Supplement: Supplementary file 1 [file b44ae90136013a8d0e2d24f6015b6097-Supplemental-Conference.zip]

Archive with 2 entries (2 files):
- 1255_pragmatically_learning_from_pe-14-19.pdf
- __MACOSX/._1255_pragmatically_learning_from_pe-14-19.pdf
